# Supplementary material for: Comparison of Proximal and Remote Sensing for the Diagnosis of Crop Status in Site-Specific Crop Management
Source: MDPI journal article supplement (doi:10.3390/s22010019), 2021-12-22
Supplement: s1 [file s1]

## Supplement Materials

**Table S1.** Tukey HSD post-hoc test for the main effect of years on the variables (vegetation indexes).

| IRMI |          |          |          |          | IBI   |          |          |          |          |
|------|----------|----------|----------|----------|-------|----------|----------|----------|----------|
| Year | 2017     | 2018     | 2019     | 2020     | Year  | 2017     | 2018     | 2019     | 2020     |
| 2017 |          | 0.000008 | 0.000008 | 0.000008 | 2017  |          | 0.028327 | 0.000008 | 0.000008 |
| 2018 | 0.000008 |          | 0.000008 | 0.000008 | 2018  | 0.028327 |          | 0.000008 | 0.000008 |
| 2019 | 0.000008 | 0.000008 |          | 0.000008 | 2019  | 0.000008 | 0.000008 |          | 0.000008 |
| 2020 | 0.000008 | 0.000008 | 0.000008 |          | 2020  | 0.000008 | 0.000008 | 0.000008 |          |
| EVI  |          |          |          |          | GNDVI |          |          |          |          |
| 2017 |          | 0.000008 | 0.000008 | 0.000008 | 2017  |          | 0.000008 | 0.000008 | 0.000008 |
| 2018 | 0.000008 |          | 0.000008 | 0.000015 | 2018  | 0.000008 |          | 0.000008 | 0.000008 |
| 2019 | 0.000008 | 0.000008 |          | 0.000008 | 2019  | 0.000008 | 0.000008 |          | 0.000008 |
| 2020 | 0.000008 | 0.000015 | 0.000008 |          | 2020  | 0.000008 | 0.000008 | 0.000008 |          |
| NDMI |          |          |          |          | NDRE  |          |          |          |          |
| 2017 |          | 0.000008 | 0.000008 | 0.000008 | 2017  |          | 0.000008 | 0.000008 | 0.000008 |
| 2018 | 0.000008 |          | 0.000008 | 0.000008 | 2018  | 0.000008 |          | 0.000008 | 0.000008 |
| 2019 | 0.000008 | 0.000008 |          | 0.000008 | 2019  | 0.000008 | 0.000008 |          | 0.000008 |
| 2020 | 0.000008 | 0.000008 | 0.000008 |          | 2020  | 0.000008 | 0.000008 | 0.000008 |          |
| NDVI |          |          |          |          | NRERI |          |          |          |          |
| 2017 |          | 0.000008 | 0.000008 | 0.000008 | 2017  |          | 0.000008 | 0.000008 | 0.000008 |
| 2018 | 0.000008 |          | 0.000008 | 0.000008 | 2018  | 0.000008 |          | 0.000008 | 0.000008 |
| 2019 | 0.000008 | 0.000008 |          | 0.000008 | 2019  | 0.000008 | 0.000008 |          | 0.000008 |
| 2020 | 0.000008 | 0.000008 | 0.000008 |          | 2020  | 0.000008 | 0.000008 | 0.000008 |          |

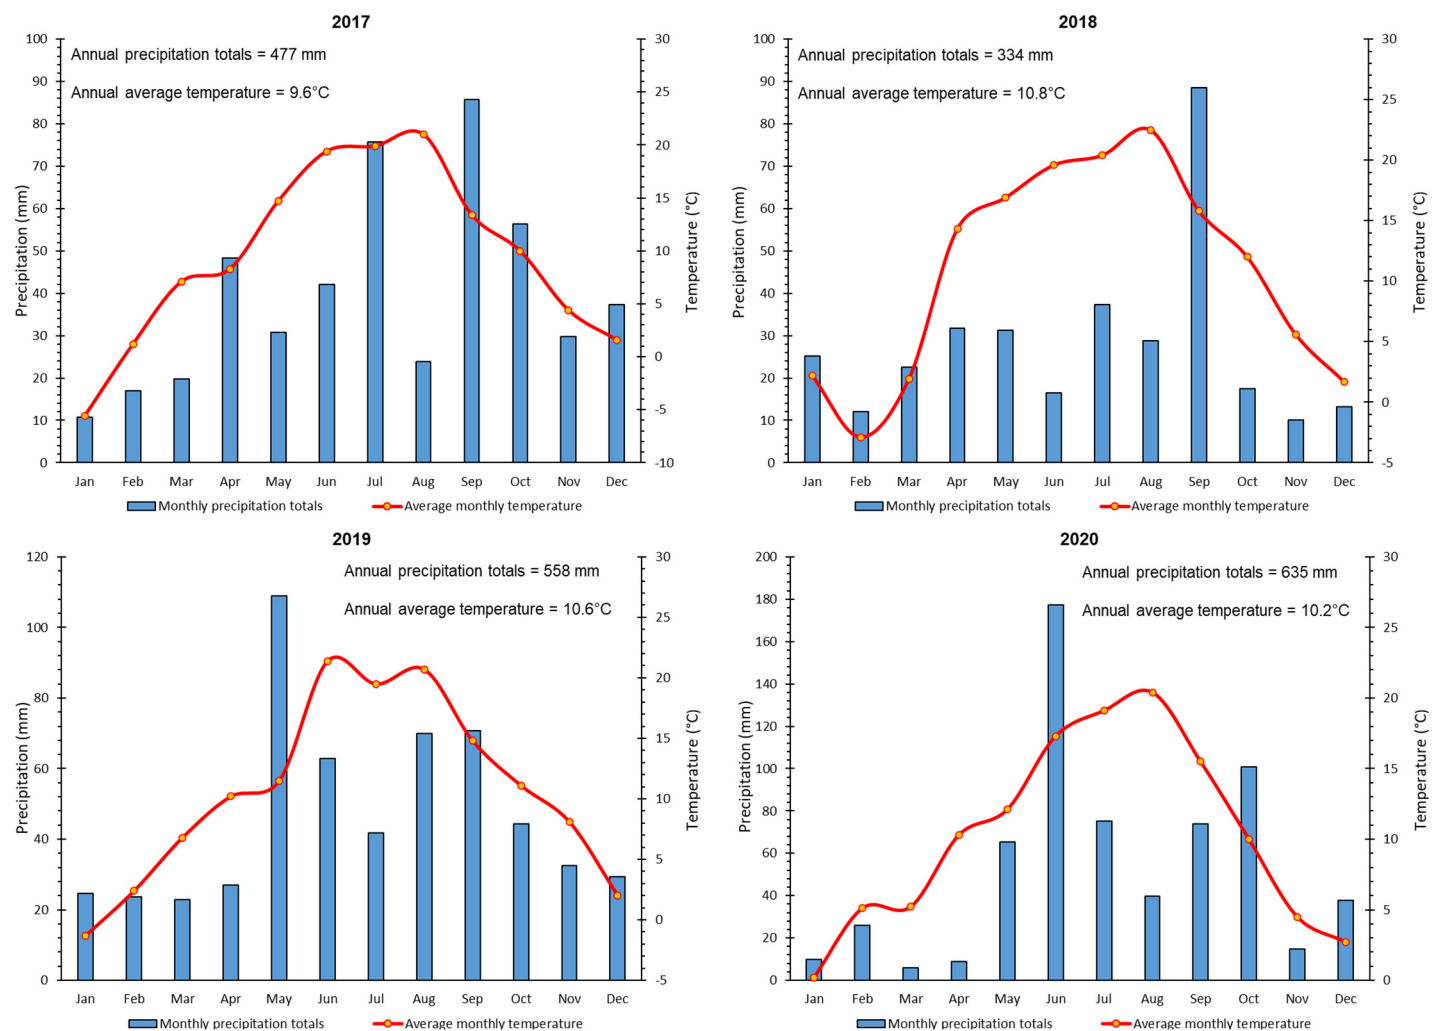

**Figure S1.** Monthly precipitation and average temperature of area of our interest for individual years of field experiment: Meteorological parameters for individual years (2017–2020) were measured by DAVIS Vantage Pro2 meteorological station (Davis Instruments, CA, USA).
